# Supplementary material
Source: publisher site journal article supplement (https://www.dovepress.com/article/587944)
Supplement: Supplementary file 1 [file 587944%20Supplementary%20Material.docx]

Supplemental table 1 Comparison of SPID between treatment groups after adjustment for the intraoperative dose of sufentanil

|  | **Mean difference (95% CI)** |
| --- | --- |
| rSPID48h | -2.45 (-20.60 to 15.70) |
| rSPID24h | -0.93 (-10.98 to 9.12) |
| rSPID8h | -0.49 (-3.14 to 2.17) |
| rSPID3h | -0.07 (-0.65 to 0.52) |
| rSPID24-28h | -1.51 (-11.52 to 8.49) |
| rSPID8-24h | -0.44 (-9.41 to 8.52) |
| aSPID48h | 1.98 (-18.19 to 22.15) |
| aSPID24h | 2.50 (-7.96 to 12.95) |
| aSPID8h | 1.63 (-1.50 to 4.77) |
| aSPID3h | 0.44 (-0.42 to 1.29) |
| aSPID24-28h | -0.52 (-12.51 to 11.47) |
| aSPID8-24h | 0.87 (-8.66 to 10.39) |
